# Supplementary material
Source: PubMed Central journal article supplement (PMC3470756)
Supplement: NIHMS361106-supplement-supplement_1.pdf [file NIHMS361106-supplement-supplement_1.pdf]

**FIGURE CAPTIONS**

Figure 1. Change in functional status during admission across timepoints for all 39 children. Each line represents an individual child.

Figure 2. Contingency tables showing frequency of children in each discharge group by presence or absence of change in raw WeeFIM Total scores by Month 1 (n = 38) or Month 2 (n = 39).

Figure 3. Change in functional status for the subgroup of 16 children with three-month follow-up data. Each line represents an individual child.

Supplemental Digital Content 1. Table that presents demographic and rehabilitation data on children with follow-up WeeFIM DFQ scores above 30. doc

Supplemental Digital Content 2. Table that presents demographic and rehabilitation data on children with follow-up WeeFIM DFQ scores below 30. doc

SDC 1. Demographic and rehabilitation data on children with follow-up WeeFIM DFQ scores above 30

| Age, Sex | Premorbid concerns  | Injury Type | GCS | TFC | Imaging Modality/ Deepest Lesion             | TTA | LOS | Rehab events                           | Admission                                   | Month 1                                                                               | Month 2                                                                          | Discharge                                                                                                            | Follow-Up                                                                        | Disposition |
|----------|---------------------|-------------|-----|-----|----------------------------------------------|-----|-----|----------------------------------------|---------------------------------------------|---------------------------------------------------------------------------------------|----------------------------------------------------------------------------------|----------------------------------------------------------------------------------------------------------------------|----------------------------------------------------------------------------------|-------------|
| 1 15 F   | Learning disability | f           | 7   | 16  | MRI corpus callosum                          | 16  | 57  | Autonomic storming.                    | 14 MCS. RLA 3.                              | 15 CS. RLA 4-5. Functional verbal communication.                                      | 44 CS. RLA 5. Cognitive impairments. Ambulates with moderate assistance.         | 75 CS. RLA 7. Independent with motor skills. Cognitive impairments. Emerged from PTA.                                | 100 CS. Higher-level cognitive impairments.                                      | I           |
| 2 13 F   | Mood disorder       | b           | 4   | 21  | CT left parietal                             | 19  | 46  | None.                                  | 14 MCS. RLA 3.                              | 31 CS. RLA 4. Functional verbal communication. Ambulates with moderate assistance.    | 54 CS. RLA 5. Cognitive impairments. Ambulates independently.                    | 72 CS. RLA 5-6. Cognitive impairments.                                                                               | 98 CS. Emerged from PTA. Higher-level cognitive impairments. Low mood.           | II          |
| 3 8 M    | None                | e           | 5   | 41  | MRI thalami                                  | 30  | 68  | Transfer due to possible encephalitis. | 14 MCS. RLA 2-3.                            | 16 MCS. RLA 4-5. Purposeful movement in UE only.                                      | 31 CS. RLA 6. Functional verbal communication. Cognitive impairments.            | 54 CS. RLA 7. Emerged from PTA. Ambulates with AFOs. Cognitive impairments.                                          | 97 CS. Higher-level cognitive impairments.                                       | II          |
| 4 13 M   | None                | d           | 7   | 5   | CT subdural and intra-ventricular hemorrhage | 5   | 49  | None.                                  | 14 CS. RLA 4. Sits with minimal assistance. | 21 CS. RLA 4. Non-weight bearing in LE. Functional UE but dependent due to agitation. | 26 CS. RLA 6. Functional verbal communication. Emerged from PTA.                 | 69 CS. RLA 7. Higher-level cognitive impairments. Emotional concerns. Ambulates with device due to orthopedic needs. | 90 CS. Isolated cognitive impairments. Emotional concerns.                       | I           |
| 5 3 M    | None                | b           | 3   | 10  | MRI none                                     | 8   | 34  | None.                                  | 18 CS. RLA 5.                               | 47 CS. RLA 5. Functional verbal communication. Resolution of PTA.                     | n/a                                                                              | 63 CS. RLA 6. Cognitive impairments. Mild ataxic gait. Fine motor difficulties.                                      | 80 CS. Cognitive impairments. Behavioral concerns. Functional motor skills.      | II          |
| 6 6 F    | None                | b           | 3   | 25  | CT bifrontal                                 | 26  | 45  | Transfer for orthopedic surgery.       | 15 MCS. RLA 3.                              | 35 CS. RLA 4. Functional verbal communication.                                        | 48 CS. RLA 5-6. Severe language and cognitive impairments.                       | 56 CS. RLA 6. Emerged from PTA.                                                                                      | 77 CS. Higher-level cognitive impairments.                                       | II          |
| 7 9 M    | ADHD                | b           | 5   | 50  | MRI brainstem                                | 22  | 95  | Transfer for dural tear repair.        | 14 MCS. RLA 2.                              | 14 MCS. RLA 3.                                                                        | 15 MCS. RLA 3-4. Improved head and trunk control. Emerging verbal communication. | 43 CS. RLA 6-7. Emerged from PTA. Aphasia. Left hemiparesis. Bilateral hearing loss. Ambulates with walker.          | 72 CS. Improved speech. Cognitive impairments. Ambulates with cane.              | II          |
| 8 18 M   | ADHD                | a           | 3   | 25  | MRI brainstem                                | 23  | 116 | None.                                  | 14 MCS. RLA 3.                              | 17 MCS. RLA 5. Dense right hemiparesis.                                               | 20 CS. RLA 5-6. Functional nonverbal communication.                              | 60 CS. RLA 7-8. Right hemiparesis and ataxia. Emerged from PTA. Cognitive impairments. Depression.                   | 67 CS. Right hemiparesis. Ataxia. Dysarthria. Cognitive impairments. Depression. | II          |

Abbreviations: GCS = Glasgow Coma Scale, TFC = time to follow commands; TTA = time to admission; LOS = length of stay; DFQ = WeeFIM Total; MCS = minimally conscious state; CS = full consciousness; RLA = Rancho Los Amigos Scale score (original version, scores range 1-8); PTA = posttraumatic amnesia; PEG = percutaneous gastrostomy tube; UE = upper extremity; LE = upper extremity; AT = assistive technology  
 Notes: Injury Type a = Restrained driver in MVC; b = Restrained passenger in MVC; c = Unrestrained passenger in MVC; d = Pedestrian struck by vehicle; e = Helmeted biker struck by vehicle; f = Dragged by animal.  
 Disposition I = Outpatient therapies; II = Day rehabilitation program

SDC 2. Demographic and rehabilitation data on children with follow-up WeeFIM DFQ scores below 30

|    | Age, Sex | Premorbid concerns             | Injury Type | GCS | TFC | Imaging Modality/ Deepest Lesion | TTA | LOS | Rehab events                                                                       | Admission        | Month 1          | Month 2          | Discharge                                                                                                                                                                   | Follow-Up                                                                                                                        | Disposition |
|----|----------|--------------------------------|-------------|-----|-----|----------------------------------|-----|-----|------------------------------------------------------------------------------------|------------------|------------------|------------------|-----------------------------------------------------------------------------------------------------------------------------------------------------------------------------|----------------------------------------------------------------------------------------------------------------------------------|-------------|
| 9  | 7 M      | Attention, behavioral concerns | d           | 4   | 92  | MRI brainstem                    | 32  | 59  | Autonomic storming.                                                                | 15 VS. RLA 2-3.  | 15 MCS. RLA 2-3. | 15 MCS. RLA 2-3. | 15 MCS. RLA 3. Minimal spontaneous movement of RUE. Severe motor impairments. PEG dependent.                                                                                | 29 MCS. Increased responsiveness. No purposeful movement of extremities. PEG dependent.                                          | I           |
| 10 | 16 F     | None                           | a           | 3   | 35  | MRI brainstem                    | 32  | 99  | Intrathecal baclofen pump placed. Transfer for orthopedic surgery.                 | 14 MCS. RLA 3.   | 14 MCS. RLA 3.   | 14 MCS. RLA 4.   | 16 MCS. RLA 3-5. No functional communication. Minimal purposeful movement in UE. Continued reliance on tracheostomy and PEG.                                                | 25 CS. Functional communication using AT device. In PTA. Severe motor impairments. Continued reliance on tracheostomy and PEG.   | I           |
| 11 | 14 F     | ADHD                           | c           | 3   | 44  | MRI brainstem                    | 38  | 198 | Intrathecal baclofen pump placed. PEG revision.                                    | 14 MCS. RLA 2-3. | 14 MCS. RLA 2-3. | 16 MCS. RLA 2-3. | 25 CS. RLA 5. Functional communication with AT device. Resolved PTA with cognitive impairments. Severe motor impairments. Reliance on tracheostomy and PEG.                 | 22 CS. Improved use of AT device. Severe motor impairments. Reliance on tracheostomy and PEG.                                    | I           |
| 12 | 12 M     | None                           | b           | 5   | 31  | MRI brainstem                    | 35  | 131 | Transfer for cranioplasty, orthopedic surgery. Recurrent urinary tract infections. | 14 MCS. RLA 2-3. | 14 MCS. RLA 3.   | 14 MCS. RLA 3.   | 17 MCS. RLA 3. Limited ability to point with LUE. No functional movement in other extremities. Continued reliance on tracheostomy and PEG. CPAP at night for central apnea. | 21 CS. Nonverbal. Functional communication using AT device. In PTA. Severe cognitive, motor impairments. Functional use of UE.   | II          |
| 13 | 8 F      | None                           | d           | 4   | 70  | MRI brainstem                    | 19  | 63  | None.                                                                              | 14 MCS. RLA 2-3. | 14 MCS. RLA 3.   | 14 MCS. RLA 3.   | 17 MCS. RLA 3. Minimal spontaneous movements of extremities. NG tube dependent.                                                                                             | 21 CS. Functional nonverbal communication. In PTA. Non-ambulatory. Left hemiparesis. Left-sided hearing loss. NG tube dependent. | I           |
| 14 | 17 M     | None                           | a           | 5   | 21  | MRI brainstem                    | 19  | 254 | Multiple transfers due to medical instability, cranioplasty.                       | 14 MCS. RLA 3.   | 14 MCS. RLA 3.   | 14 MCS. RLA 3.   | 23 MCS. RLA 3-4. Minimal purposeful movement in UE. Continued reliance on PEG.                                                                                              | 15 MCS. Severe cognitive and motor impairment. Continued reliance on PEG. Increased seizures.                                    | I           |
| 15 | 13 F     | Learning disability            | d           | 5   | 129 | MRI right thalamus               | 31  | 91  | Multiple transfers due to medical instability.                                     | 14 VS. RLA 2-3.  | 14 VS. RLA 2-3.  | 14 MCS. RLA 2-3. | 15 MCS. RLA 3. No spontaneous movement. Continued reliance on tracheostomy and PEG.                                                                                         | 15 MCS. Minimal purposeful movement of head and hands. Continued reliance on tracheostomy and PEG.                               | I           |
| 16 | 8 M      | ADHD, behavioral concerns      | e           | 3   | 91  | MRI brainstem                    | 35  | 147 | Multiple transfers due to medical instability.                                     | 14 VS. RLA 2.    | 14 VS. RLA 2.    | 14 MCS. RLA 3.   | 14 MCS. RLA 3. Increased eye opening. Minimal spontaneous movement. Continued reliance on tracheostomy and PEG.                                                             | 14 MCS. No visual tracking. Minimal spontaneous movement. Continued reliance on tracheostomy and PEG.                            | I           |

Abbreviations: GCS = Glasgow Coma Scale, TFC = time to follow commands; TTA = time to admission; LOS = length of stay; DFQ = WeeFIM Total; VS = vegetative state; MCS = minimally conscious state; CS = full consciousness; RLA = Rancho Los Amigos Scale score (original version, scores range 1-8); PTA = posttraumatic amnesia; PEG = percutaneous gastrostomy tube; UE = upper extremity; LE = upper extremity; AT = assistive technology. Notes: Injury Type a = Restrained driver in MVC; b = Restrained passenger in MVC; c = Unrestrained passenger in MVC; d = Pedestrian struck by vehicle; e = Biker struck by vehicle; f = Dragged by animal. Disposition I = Outpatient therapies; II = Day rehabilitation program.
